1 Limitations of lymphoblastoid cell lines  
2 for establishing genetic reference  
3 datasets in the immunoglobulin loci

4

5 Limitations of LCL for IG reference datasets

6

7 Oscar L. Rodriguez<sup>1</sup>, Andrew J. Sharp<sup>2</sup>, Corey T. Watson<sup>1</sup>

8

9 <sup>1</sup> Department of Biochemistry and Molecular Genetics, University of Louisville School of  
10 Medicine, Louisville, KY USA

11 <sup>2</sup>Department of Genetics and Genomic Sciences, Icahn School of Medicine at Mount Sinai, New  
12 York, NY, USA

13

14 Corresponding author: [corey.watson@louisville.edu](mailto:corey.watson@louisville.edu)

15

## 16 Abstract

17 Lymphoblastoid cell lines (LCLs) have been critical to establishing genetic resources for  
18 biomedical science. They have been used extensively to study human genetic diversity,  
19 genome function, and inform the development of tools and methodologies for augmenting  
20 disease genetics research. While the validity of variant callsets from LCLs has been  
21 demonstrated for most of the genome, previous work has shown that DNA extracted from LCLs  
22 is modified by V(D)J recombination within the immunoglobulin (IG) loci, regions that harbor  
23 antibody genes critical to immune system function. However, the impacts of V(D)J on data  
24 generated from LCLs has not been extensively investigated. In this study, we used LCL-derived  
25 short read sequencing data from the 1000 Genomes Project (n=2,504) to identify signatures of  
26 V(D)J recombination. Our analyses revealed sample-level impacts of V(D)J recombination that  
27 varied depending on the degree of inferred monoclonality. We showed that V(D)J associated  
28 somatic deletions impacted genotyping accuracy, leading to adulterated population-level  
29 estimates of allele frequency and linkage disequilibrium. These findings illuminate limitations of  
30 using LCLs for building genetic resources in the IG loci, with implications for interpreting  
31 previous disease association studies in these regions.

## 32 Author summary

33 Lymphoblastoid cell lines (LCLs) are cells that have been manipulated to proliferate indefinitely  
34 in order to provide a replenishable source of DNA. However, because these cell lines are  
35 derived from B cells which have undergone V(D)J recombination they contain somatic deletions  
36 within regions of the genome that encode antibody genes. Although several large collaborative  
37 projects have utilized DNA from LCLs to generate invaluable genomic resources for the  
38 scientific community, the negative impacts of cell line artifacts in these regions of the genome

39 have not been fully appreciated. In this study, we used newly released sequencing data from a  
40 large collection of LCLs to determine that the non-inherited artificial deletions within the antibody  
41 gene loci can have detrimental effects on downstream genetic analyses.

42

43 **Keywords:** Immunoglobulin heavy chain locus; Lymphoblastoid cell lines; Genotyping; Genetic  
44 Association Analysis; Linkage Disequilibrium

## 45 Introduction

46 Lymphoid blastoid cell lines (LCL) are generated by infecting B cells with the Epstein  
47 Barr Virus (EBV)[1] to create immortalized cell lines. Various consortia, including The  
48 International HapMap Project[2, 3], 1000 Human Genome Project (1KGP)[4–6], Genome In A  
49 Bottle[7, 8] and Human Genome Structural Variation Consortium[9] have used DNA from LCLs  
50 to characterize common genetic variation, generate gold standard sets of small insertions and  
51 deletions (indels), and comprehensively genotype structural variants (SV). Variant call sets from  
52 these initiatives have been instrumental to the genomics community, and are routinely used in  
53 genome-wide association studies (GWAS) and other genetic studies. Genome-wide genotypes  
54 from LCLs have been shown to be nearly identical to genotypes derived from whole blood or  
55 peripheral blood mononuclear cells (PBMC) using SNP arrays[10], whole exome  
56 sequencing[11, 12] and whole genome sequencing[13]. However, somatic LCL-associated  
57 alterations are present in particular regions of the genome, namely within the immunoglobulin  
58 (IG) heavy (IGH) and light (Ilambda, IGL; kappa, IGK) chain loci. These alterations could impact  
59 sequencing, mapping, and genotype results in these regions, with potential implications for  
60 downstream uses of these data.

61           The IG loci encode the variable (V), diversity (D) and joining (J) gene segments that  
62   serve as the building blocks for the expression of functional B cell receptors (BCRs) and  
63   antibodies (Abs). During B cell development, the V, D, and J gene segments within each IG  
64   locus (V and J in the case of IGL and IGK) are somatically rearranged through a process called  
65   V(D)J recombination[14]. During this process, intervening DNA between recombined V, D, and J  
66   segments is excised. The size of these somatic deletions on the recombined chromosome  
67   depends on the selected V, D, and J genes, but can extend 100's of Kb, and will vary from cell  
68   to cell. Collectively, DNA isolated across a pool of B cells (e.g., naive B cells) representing many  
69   independent V(D)J recombination events would be expected to represent each germline  
70   haplotype present in a given sample (Fig. 1). In contrast, a pool of B cells originating from a  
71   single or dominant expanded B cell would harbor DNA not fully representative of both paternal  
72   and maternal germline haplotypes within the IG loci (Fig. 1). In the latter instance, genotyping  
73   methods dependent on different read alignment signatures such as read depth/coverage,  
74   discordant read mapping, soft-clipped or split reads could produce inaccurate germline  
75   genotypes.

76           Recent long read sequencing and assembly of complete IGH haplotypes from selected  
77   1KGP individuals has revealed the presence of V(D)J recombination associated deletions[15],  
78   indicating that genotypes derived from such samples within regions impacted by V(D)J  
79   recombination are inaccurate. While it has been speculated previously that V(D)J recombination  
80   would have negative impacts on LCL-derived sequencing data [16–18], this has not been  
81   comprehensively investigated. Given this, we sought to evaluate the extent of sample-level  
82   V(D)J recombination in LCL-derived short read sequencing data from the 1KGP, and assess  
83   downstream impacts of these somatic events. We demonstrate that short read data is affected  
84   by V(D)J recombination and, depending on the sample, is derived from either single dominant or  
85   multiple B cell clones. We show that variation in sample clonality is associated with variability in

86 genotyping accuracy, negatively impacting estimates of allele frequency and linkage  
87 disequilibrium (LD). These data raise important considerations for using 1KGP genotypes to  
88 augment genetic association studies in the IG loci, and in addition to other issues discussed  
89 previously[16–18], may further explain the paucity of disease associations within these complex  
90 regions of the genome.

## 91 Materials/Subjects and Methods

### 92 1000 Human Genome Project Data

93 Paired-end 150 bp PCR-free 30X coverage Illumina data on 2504 individuals from the 1KGP[19]  
94 was downloaded from the European Bioinformatics Institute (EBI) under the study ID  
95 ERP114329. 1KGP phase 3[4] SNPs were downloaded from  
96 [ftp://ftp.1000genomes.ebi.ac.uk/vol1/ftp/data\\_collections/1000\\_genomes\\_project/release/20190](ftp://ftp.1000genomes.ebi.ac.uk/vol1/ftp/data_collections/1000_genomes_project/release/20190)  
97 [312\\_biallelic\\_SNV\\_and\\_INDEL/ALL.chr14.shapeit2\\_integrated\\_snvindels\\_v2a\\_27022019.GRC](ftp://ftp.1000genomes.ebi.ac.uk/vol1/ftp/data_collections/1000_genomes_project/release/20190)  
98 [h38.phased.vcf.gz](ftp://ftp.1000genomes.ebi.ac.uk/vol1/ftp/data_collections/1000_genomes_project/release/20190).

### 99 Assessment of insert sizes, read depth, and the identification of 100 V(D)J recombination events

101 Insert sizes for read pairs within each sample were calculated using the Picard  
102 (<https://github.com/broadinstitute/picard>) CollectInsertSizeMetrics tool with the following  
103 parameters: `--DEVIATIONS 1000000 --MINIMUM\_PCT 0` for reads spanning  
104 chr14:105862198-107043718. The same tool and parameters were used for ten random 1.2 MB  
105 windows across the genome. To calculate read depth across the IGHD and V regions, we used  
106 samtools[23] (IGHD, hg38, chr14:105,865,458-105,939,756; IGHV, hg38, chr14:105,939,756-

107 106,883,718). To identify read pairs within each sample representing V(D)J recombination  
108 events, we utilized a custom python script. For each sample, the number of clones was  
109 calculated by counting the number of unique IGHV and IGHJ gene pairs detected. The  
110 frequency of each “clone” was calculated by determining the number of reads mapping to a  
111 unique IGHV and IGHJ gene pair, and taking this as a fraction of the total number of reads  
112 assigned to any IGHV/IGHJ pair. The sizes of somatic deletions were determined by calculating  
113 the genomic distances between the IGHJ and IGHV genes utilized in a given V(D)J event.

## 114 Analysis of heterozygosity, allele frequency, and LD

115 The percentage of heterozygous SNPs was calculated for each sample in the  
116 centromeric and telomeric region of the selected V gene in the dominant clone. Two VCFs were  
117 created for each region using tabix to select the region of interest on the 1KGP phase 3 VCF.  
118 The telomeric region was always set to start at the beginning of *IGHV6-1* (chr14:105,939,756;  
119 GRCh38). The fraction of heterozygous SNPs was calculated by counting the number of  
120 heterozygous SNPs over the total number of SNPs in each VCF.

121 To assess the effects of V(D)J recombination on allele frequency estimates and LD, we  
122 subsetted the 1KGP phase 3 genotype call set to samples from the “AFR” superpopulation,  
123 further selecting samples representing two extremes of clonality (0-25%, n=38; 75-100%, n=38).  
124 Allele frequencies for each set of samples was calculated using the vcftools `freq` tool. The LD  
125 scores were calculated for the African samples of each set of samples using the vcftools `hap-  
126 r2` tool with the parameters `--ld-window 1000000 --min-r2 0.01`.

127

## 128 Results

### 129 Detecting signatures of V(D)J recombination

130 To determine the effect of V(D)J recombination on whole genome sequencing (WGS)  
131 data in IGH, we used paired-end 150 bp PCR-free Illumina data on 2,504 individuals from the  
132 1KGP, recently resequenced to high coverage[19]. The occurrence of V(D)J recombination  
133 results in large somatic deletions within the IGH locus spanning the IGHJ, IGHD, and IGHV  
134 regions. To assess signatures of these somatic deletions we first analyzed paired-end mapping  
135 distances, as measured by the predicted “insert sizes”. We reasoned that the presence of V(D)J  
136 recombination events would result in larger insert sizes, and that these would be enriched within  
137 IGH. To assess this, we calculated the number of read pairs with an insert size >900 bp (two  
138 times the library DNA insert size) at 10 random 1.2 MB windows (the length of the IGH locus in  
139 GRCh38) across the genome from five individuals chosen at random. Across these regions in  
140 the selected individuals, we observed that 0.08% to 0.12% (mean = 0.10%) of the paired-end  
141 reads contained an insert size greater than 900 bps. In contrast, across all samples, 0.13% to  
142 1.55% (mean = 0.49%) of paired-end reads in IGH contained an insert size greater than 900  
143 bps. This is almost a 5-fold increase in the number of paired-end reads with a larger insert size  
144 (Fig. 2A).

145 To further evaluate the effect of V(D)J recombination, we calculated the coverage over  
146 the IGHD region. During B cell development, through the formation of the pre-B cell receptor,  
147 V(D)J recombination results in a loss of DNA between selected IGHJ and IGHD gene segments  
148 on each homologous chromosome[20]. Therefore, if V(D)J recombination has occurred, there  
149 should be limited to no coverage within the IGHD region. The closest IGHJ and IGHD gene pair,  
150 *IGHJ1* and *IGHD7-27*, are within 100 bps, so we assessed coverage between *IGHJ1* and

151 *IGHD1-26* (~15 Kb) across all 2504 individuals, and observed a mean coverage of 0.76X (range  
152 = 0 - 30.6). We also observed a mean coverage of 7.30X between *IGHJ1* and *IGHV6-1*, in  
153 contrast to a mean coverage of 24.68X across the entirety of the IGHV region (Fig. 2B).

154 We next used the paired-end data to directly detect V(D)J recombination events by  
155 identifying read pairs with one mate overlapping an IGHJ gene and the other mate overlapping  
156 an IGHV gene. We detected read pairs representing V(D)J recombinants in all 2,504 samples,  
157 with a mean of 22 V(D)J associated read pairs per sample (range = 2 - 66). V(D)J  
158 rearrangements utilizing *IGHJ4* and *IGHV3-23* were the most common (Supplemental Fig. 1).  
159 Taken together, these three pieces of evidence, increased insert sizes, decreased coverage  
160 over IGHD, and the direct detection of read pairs overlapping V(D)J recombination events,  
161 indicate that in fact LCLs utilized by the 1KGP cohort have undergone V(D)J recombination.

## 162 Sequencing data derived from multiple B cell clones

163 Given that V(D)J recombination has occurred across the cohort, we sought to determine  
164 whether all samples were affected equally. We reasoned that samples with sequencing data  
165 from a single B cell clone (monoclonal) or from multiple clones (polyclonal) will be differentially  
166 impacted by the effects of V(D)J (Fig. 3A). We therefore sought to determine the number and  
167 frequency of V(D)Js in each sample. To do this, we assigned read pairs overlapping V(D)J  
168 events to their respective combination of IGHJ and IGHV genes. Reads across a given dataset  
169 harboring the same IGHJ/IGHV combination were grouped, and used as a proxy for a group of  
170 clonally related sequences. We thus took the number of grouped sequence reads to represent  
171 the frequency of a particular IGHJ/IGHV combination, which we heretofore refer to as a clone  
172 (Fig. 3A). Following this, we calculated the number of unique IGHJ/IGHV combinations  
173 (“clones”) present in each sample, and their relative frequency, allowing us to approximate the  
174 number of different B cell clones represented in a sample. We found that sequences across



175 samples in the cohort were derived from a mean of 10.76 B cell clones (range = 1 - 30; Fig. 3B).  
176 From this, 18 samples were predicted to be monoclonal, represented by reads mapping to only  
177 a single clone. We also reasoned that polyclonal samples, represented by many clones, but in  
178 which the majority of sequencing data is predicted to be derived from a dominant clone will have  
179 profiles similar to those observed for monoclonal samples. To estimate this, we asked what  
180 proportion of all sequences containing a V(D)J recombination event were represented by the  
181 most frequently observed clone. In doing this, we found that in 407 and 88 samples,  
182 respectively, 50% and 75% of all reads containing V(D)J recombination events mapped to a  
183 single clone. This indicated that although these samples had a polyclonal signature, the majority  
184 of sequencing data was likely derived from a single dominant clone. Based on this  
185 approximation, across samples, the top clone identified contributed on average 32.94% (range  
186 = 5 - 100%) of the sequencing data (Fig. 3C). We observed a modest population bias, with  
187 African and European individuals containing a slightly greater fraction of sequencing data from a  
188 single clone (Supplemental Fig. 2).

189         Depending on the clonality of the sample and the genes involved in the primary V(D)J  
190 recombination event present within a sample, the size of the region impacted was expected to  
191 vary. We estimated this in each sample based on the most prevalent IGHJ/IGHV gene  
192 combination observed, revealing that in many samples the predicted size of these somatic  
193 deletions was extensive. In the 18 monoclonal samples, we found that an average of 464 Kb of  
194 the IGH locus was impacted by V(D)J recombination (range = 74.3 - 937.2 Kb). In samples that  
195 were polyclonal, but still represented by a dominant clone (i.e., those in which >50% and >75%  
196 of sequence data were derived from a single IGHJ/IGHV combination), the regions impacted by  
197 V(D)J recombination were found to be on average 356 Kb (50%, range = 74.3 - 945.0 Kb) and  
198 401 Kb (75%, range = 74.3 - 945.0 Kb) in size (Fig. 3D). Regions affected by V(D)J  
199 recombination in each sample are provided in Supplementary Table 1.

## 200 The effects of V(D)J recombination on genotype call sets

201 We reasoned that V(D)J events could impact the accuracy of sample- and population-  
202 level genotypes in two primary ways: 1) the loss of DNA and reduced read coverage over  
203 extended regions of the locus would result in the increased likelihood of calling homozygous  
204 genotypes at heterozygous positions; 2) somatic hypermutations (SHMs) in recombined genes  
205 could introduce false heterozygous SNPs. Furthermore, these effects would likely be more  
206 prominent in monoclonal samples, as well as polyclonal samples represented by dominant  
207 clones.

208 To investigate these potential impacts, we first evaluated the number of heterozygous  
209 SNPs in the centromeric and telomeric regions of the recombined IGHV gene in monoclonal  
210 samples. We found that the mean percentage of heterozygous variants telomeric of the IGHV  
211 gene used for V(D)J recombination was 3.4 fold higher than the mean percentage of  
212 heterozygous variants centromeric of the IGHV gene ( $P = 0.003$ , two-sided paired Wilcoxon  
213 test; Fig. 4A). To assess this effect in polyclonal samples, we split individuals into four groups  
214 representing varying degrees of clonal bias, based on whether 0-25%, 25%-50%, 50%-75% and  
215 75%-100% of sequencing data within a given sample came from the dominant clone. In  
216 samples with 0 to 25% of sequencing data from the dominant clone, for which we expected to  
217 observe minimal impacts on genotyping, the mean percentage of heterozygous variants  
218 telomeric (62%) of the selected recombined IGHV gene was 1.04-fold higher than in the  
219 centromeric region (59%;  $P=0.006$ , two-sided paired Wilcoxon test; Fig. 4B). We noted  
220 significant differences in the remaining three groups as well (Fig. 4B), but the average fold-  
221 differences between heterozygous percentages telomeric to the V(D)J event relative to  
222 centromeric to the V(D)J event were greater, and was greatest in samples from the 75%-100%  
223 group (2.08-fold).

224           Additionally, we evaluated the number of heterozygous SNPs overlapping IGHV genes  
225 most frequently selected for V(D)J recombination in each sample. When stimulated by an  
226 antigen, B cells acquire SHMs within IG V, D, and J genes as a means to increase antibody  
227 affinity[21]. Therefore, SHMs in the recombined IGHV gene are more likely to be detected in  
228 monoclonal or polyclonal samples with reads primarily derived from a dominant clone. Indeed,  
229 there was a significant positive correlation ( $R = 0.33$ ,  $p\text{-value} < 2.2e\text{-}16$ ) between the  
230 contribution of sequencing data from the dominant clone and the number of the heterozygous  
231 variants within the IGHV gene selected by V(D)J recombination (Supplementary Fig. 3A). We  
232 also directly compared the number of heterozygous genotypes within the recombined IGHV  
233 genes to non-recombined IGHV genes across all samples, and observed an average of 1.92  
234 heterozygous positions in the recombined IGHV genes, compared to 0.5 in the non-recombined  
235 IGHV genes (Supplementary Fig. 3B).

## 236   The effects of V(D)J recombination on estimates of allele 237   frequency and linkage disequilibrium

238           The previous section detailed the effects on genotypes due to V(D)J recombination.  
239 Given that genotypes are used to determine allele frequencies in a population, we set out to test  
240 if allele frequencies differed between samples that are more or less monoclonal. The allele  
241 frequencies of common SNPs ( $MAF > 0.05$ ) were compared between samples within  
242 superpopulations with 0-25% (less monoclonal) and 75-100% (more monoclonal) of sequencing  
243 data derived from the dominant clone. Of the 4,354 SNPs analyzed, 1,258 (29%) had an allele  
244 frequency difference greater than 0.05 (Fig. 5A). Since V(D)J recombination excises DNA 3' of  
245 selected IGHV genes, we would expect to observe more genotyping errors caused by V(D)J  
246 related somatic deletions within the centromeric region of the IGHV locus. Consistent with this,  
247 we observed greater differences in allele frequencies within the proximal (centromeric) region of

248 the locus when comparing estimates generated from less monoclonal samples to more  
249 monoclonal samples (Fig. 5B).

250 Genotypes are also used for the calculation of LD between SNPs. Given the  
251 demonstrated impact on allele frequency estimates, we reasoned that effects on genotype  
252 accuracy would also impact LD estimates. To assess this, we chose 76 samples from the  
253 African superpopulation representing extremes of clonality. Two groups of 38 samples each  
254 from the lower clonality group and the higher clonality group were selected. The LD  $r^2$  values  
255 across the locus were computed and compared between the two groups (Fig. 5C), revealing  
256 different LD structure. We found that 11% (236,827) of the SNP pairs exhibited differences in  
257 LD ( $r^2$ ) greater than 0.1 (Supplementary Fig. 4). The differences in allele frequencies and LD  
258 estimates observed here indicated that inaccurate genotypes resulting from impacts of V(D)J  
259 recombination also affect downstream analyses.

## 260 Discussion

261 Previous studies have concluded that there are minimal differences between genotypes  
262 from matched LCL and non-LCL samples[10–13]. While true on a genome-wide scale, here we  
263 show that the impact on the IGH locus is more apparent due to V(D)J recombination. Using  
264 1KGP samples (n=2504) recently resequenced on the Illumina NovaSeq platform to 30x  
265 coverage using PCR-free 2x150 bp libraries, we evaluated different sequencing features  
266 affected by V(D)J recombination and SHM within the IGH locus. Specifically, we demonstrated  
267 that signatures of V(D)J recombination within LCL-derived DNA can be observed, including  
268 increased insert sizes of read mate-pairs, decreased read coverage over the IGHD and  
269 proximal IGHV gene regions, as well as direct evidence of somatically recombined IGHJ and  
270 IGHV genes. By assessing the frequency of specific IGHJ/IGHV recombination events within

271 each sample, we were able to estimate the number of approximate B cell clones likely  
272 represented within a sample, and determine the proportion of sequencing data derived from  
273 each B cell clone, revealing variation in clonality across samples. Importantly, we were able to  
274 determine that V(D)J recombination can result in loss of DNA spanning large segments of the  
275 locus, with clear impacts on variant genotyping. The extent of these effects varied between  
276 samples based on the gene segments involved in the primary V(D)J recombination event, and  
277 the degree of monoclonality observed. Together these observations highlight critical limitations  
278 of using LCLs to develop comprehensive reference resources for the IGH locus at the sample  
279 and population level.

280 It has previously been argued that the locus complexity of IGH has made it difficult to  
281 study using high-throughput approaches such as short-read data and genotyping arrays[15–17].  
282 This has impeded our ability to accurately characterize genetic diversity within IGH, and robustly  
283 test hypotheses about the functional role of IGH germline variation in disease risk and antibody-  
284 mediated immunity. The analyses we have conducted here indicate that the large-scale use of  
285 LCLs for establishing genetic reference panels in IGH may also present additional barriers to  
286 effectively interrogating IGH in genetic studies with downstream implications that need to be  
287 considered. For example, LCL-derived datasets such as the 1KGP have been critical for  
288 establishing population-genetic metrics across the genome, and have been used to augment  
289 GWAS and inform functional and population genetic studies. For example, consortia efforts  
290 such as gnomAD[22] have aggregated data from multiple sources, including LCL-derived data  
291 from the 1KGP, to power such studies. However, we have shown here that genotype, allele  
292 frequency, and LD estimates are incorrect for much of IGH due in part to impacts of V(D)J  
293 events in the data. This highlights a need to reconsider use of these cohorts for such purposes.  
294 We argue that, at a minimum, the continued use of LCL-derived datasets could be improved by  
295 removing erroneous genotypes caused by V(D)J recombination induced deletions. As part of

296 this study, we have released a BED file with the coordinates of V(D)J recombined induced  
297 deletions for each sample (Supplementary Table 1). It is possible that the development of  
298 genotyping pipelines that account for such data anomalies on a per-sample basis would lead to  
299 more accurate estimates of genotype and allele frequencies within IGH, with potential  
300 downstream implications for improving imputation approaches utilized by GWAS. Finally, while  
301 the focus of our study has been on the IGH locus, these observations would be applicable to the  
302 IGL and IGK loci as well.

## 303 Acknowledgements

304 This work was supported, in part, by grants from the U.S. National Institutes of Health NIH  
305 R24AI138963 (to CTW) and NIH 1F31NS108797 (to OLR). This work was supported in part  
306 through the computational resources and staff expertise provided by the Scientific Computing at  
307 the Icahn School of Medicine at Mount Sinai.

## 308 Competing Interests

309 The authors declare no competing interests.

## 310 References

- 311 1. Frisan T, Levitsky V, Masucci M Generation of Lymphoblastoid Cell Lines (LCLs). Epstein  
312 Barr Virus Protocols 125–127
- 313 2. Consortium TIH, The International HapMap Consortium (2005) A haplotype map of the  
314 human genome. *Nature* 437:1299–1320
- 315 3. International HapMap Consortium, Frazer KA, Ballinger DG, et al (2007) A second  
316 generation human haplotype map of over 3.1 million SNPs. *Nature* 449:851–861
- 317 4. 1000 Genomes Project Consortium, Auton A, Brooks LD, et al (2015) A global reference for  
318 human genetic variation. *Nature* 526:68–74

- 319 5. 1000 Genomes Project Consortium, Abecasis GR, Auton A, Brooks LD, DePristo MA,  
320 Durbin RM, Handsaker RE, Kang HM, Marth GT, McVean GA (2012) An integrated map of  
321 genetic variation from 1,092 human genomes. *Nature* 491:56–65
- 322 6. Sudmant PH, Rausch T, Gardner EJ, et al (2015) An integrated map of structural variation  
323 in 2,504 human genomes. *Nature* 526:75–81
- 324 7. Zook JM, Chapman B, Wang J, Mittelman D, Hofmann O, Hide W, Salit M (2014)  
325 Integrating human sequence data sets provides a resource of benchmark SNP and indel  
326 genotype calls. *Nat Biotechnol* 32:246–251
- 327 8. Zook JM, Catoe D, McDaniel J, et al (2016) Extensive sequencing of seven human  
328 genomes to characterize benchmark reference materials. *Sci Data* 3:160025
- 329 9. Chaisson MJP, Sanders AD, Zhao X, et al (2019) Multi-platform discovery of haplotype-  
330 resolved structural variation in human genomes. *Nat Commun* 10:1784
- 331 10. Herbeck JT, Gottlieb GS, Wong K, Detels R, Phair JP, Rinaldo CR, Jacobson LP, Margolick  
332 JB, Mullins JI (2009) Fidelity of SNP array genotyping using Epstein Barr virus-transformed  
333 B-lymphocyte cell lines: implications for genome-wide association studies. *PLoS One*  
334 4:e6915
- 335 11. Londin ER, Keller MA, D’Andrea MR, Delgrosso K, Ertel A, Surrey S, Fortina P (2011)  
336 Whole-exome sequencing of DNA from peripheral blood mononuclear cells (PBMC) and  
337 EBV-transformed lymphocytes from the same donor. *BMC Genomics* 12:464
- 338 12. Schafer CM, Campbell NG, Cai G, et al (2013) Whole exome sequencing reveals minimal  
339 differences between cell line and whole blood derived DNA. *Genomics* 102:270–277
- 340 13. Nickles D, Madireddy L, Yang S, Khankhanian P, Lincoln S, Hauser SL, Oksenberg JR,  
341 Baranzini SE (2012) In depth comparison of an individual’s DNA and its lymphoblastoid cell  
342 line using whole genome sequencing. *BMC Genomics* 13:477
- 343 14. Jung D, Alt FW (2004) Unraveling V(D)J recombination. *Cell* 116:299–311
- 344 15. Rodriguez OL, Gibson WS, Parks T, et al A novel framework for characterizing genomic  
345 haplotype diversity in the human immunoglobulin heavy chain locus.  
346 <https://doi.org/10.1101/2020.04.19.049270>
- 347 16. Watson CT, Breden F (2012) The immunoglobulin heavy chain locus: genetic variation,  
348 missing data, and implications for human disease. *Genes Immun* 13:363–373
- 349 17. Watson CT, Matsen FA, Jackson KJL, Bashir A, Smith ML, Glanville J, Breden F, Kleinstein  
350 SH, Collins AM, Busse CE (2017) Comment on “A Database of Human Immune Receptor  
351 Alleles Recovered from Population Sequencing Data.” *The Journal of Immunology*  
352 198:3371–3373
- 353 18. Watson CT, Steinberg KM, Huddleston J, et al (2013) Complete haplotype sequence of the  
354 human immunoglobulin heavy-chain variable, diversity, and joining genes and  
355 characterization of allelic and copy-number variation. *Am J Hum Genet* 92:530–546
- 356 19. Byrska-Bishop M, Evani US, Zhao X, et al (2021) High coverage whole genome  
357 sequencing of the expanded 1000 Genomes Project cohort including 602 trios. *bioRxiv*

358 2021.02.06.430068

359 20. Vettermann C, Schlissel MS (2010) Allelic exclusion of immunoglobulin genes: models and  
360 mechanisms. *Immunol Rev* 237:22–42

361 21. Murphy KM, Weaver C (2016) *Janeway's Immunobiology*. Garland Science, Taylor &  
362 Francis Group, LLC

363 22. Karczewski KJ, Francioli LC, Tiao G, et al (2020) The mutational constraint spectrum  
364 quantified from variation in 141,456 humans. *Nature* 581:434–443

365 23. Li H, Handsaker B, Wysoker A, Fennell T, Ruan J, Homer N, Marth G, Abecasis G, Durbin  
366 R, 1000 Genome Project Data Processing Subgroup (2009) The Sequence Alignment/Map  
367 format and SAMtools. *Bioinformatics* 25:2078–2079

368

369

370

371

372

373

374

375

376

377

378

379

380

381



382 **Figures**

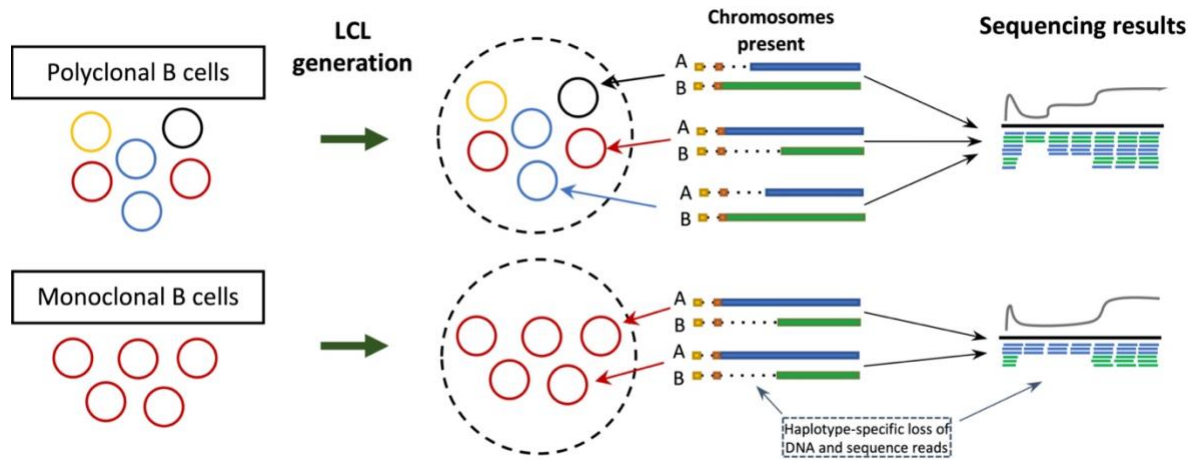

383

384 **Figure 1. Generation of LCLs can lead to loss of sequencing data**

385 LCLs are generated from a pool of B cells. A pool of polyclonal B cells will contain different  
386 V(D)J recombination events and therefore the collection of different B cell clones would lead to  
387 no loss of sequencing data from either haplotype. LCLs generated from monoclonal B cells, *i.e.*  
388 B cells with the same single V(D)J event, would lead to loss haplotype-specific sequencing data.

389

390

391

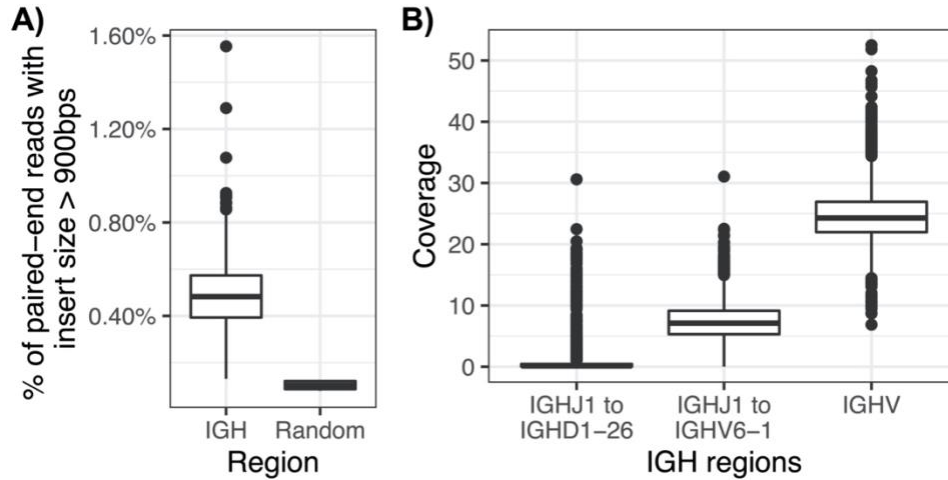

392

393 **Figure 2. Signatures of V(D)J recombination in paired-end WGS data**

394 (A) Percentage of paired-end read pairs with insert size greater than 900 bps in IGH and  
395 random genome-wide 1 Mb windows.

396 (B) WGS coverage between (1) *IGHJ1*, the IGHJ gene closest to the telomeric end and  
397 *IGHD1-26*, the second closest gene to the IGHJ gene cluster, (2) *IGHJ1* and *IGHV6-1*,  
398 the IGHV gene closest to the IGHD and IGHJ gene cluster and (3) IGHV region

399

400

401

402

403

404

405

406

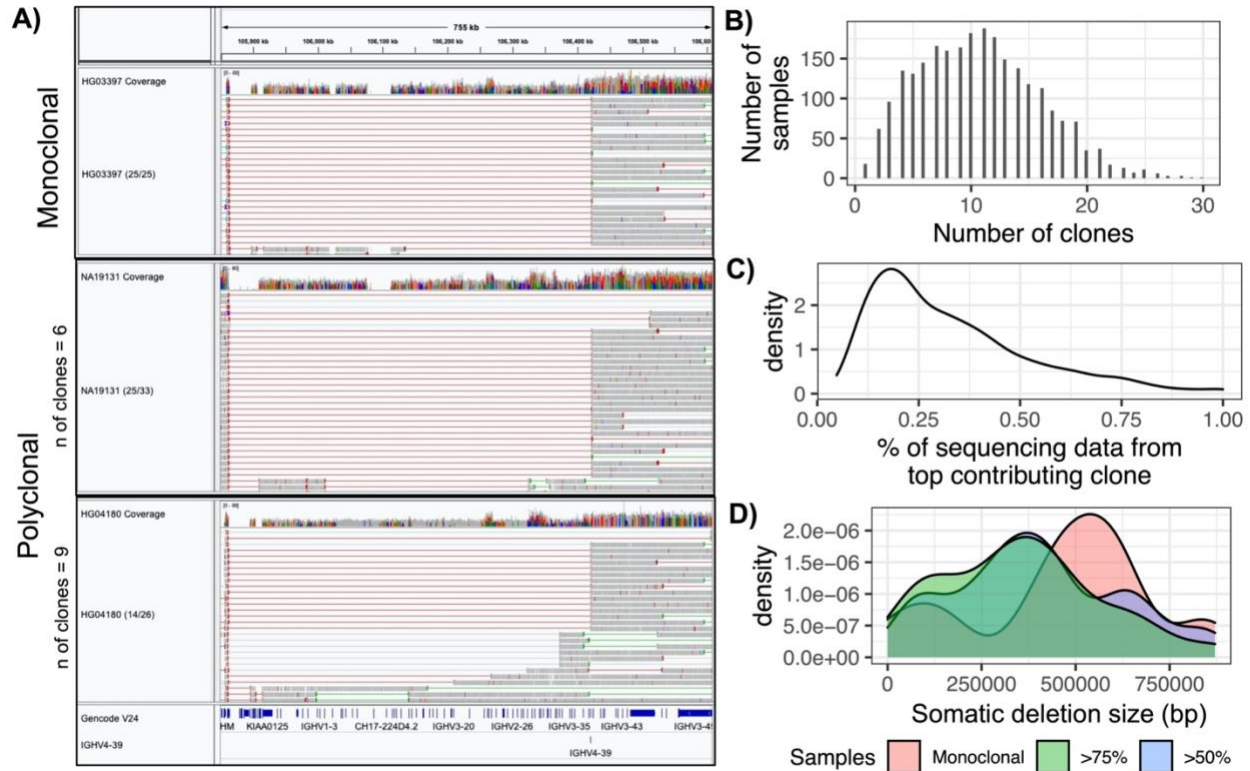

407

### 408 Figure 3. Clonality in different samples

409 (A) IGV screenshots showing three samples with different clonality but have a dominant  
410 clone with *IGHV4-39*. Red and gray lines represent large insert lengths. HG03397 has  
411 25 read pairs aligning with to an IGHJ and IGHV gene, all of which align to *IGHV4-39*  
412 and hence labelled as monoclonal. NA19131 and HG04180, which are polyclonal, have  
413 25/33 and 14/26 read pairs aligning to *IGHV4-39*.

414 (B) Number of samples with different clonalities

415 (C) Percentage of sequencing data derived from dominant clone

416 (D) Amount of IGHV DNA lost in monoclonal samples and polyclonal samples with 75% and  
417 50% of their sequencing data derived from the dominant clone

418

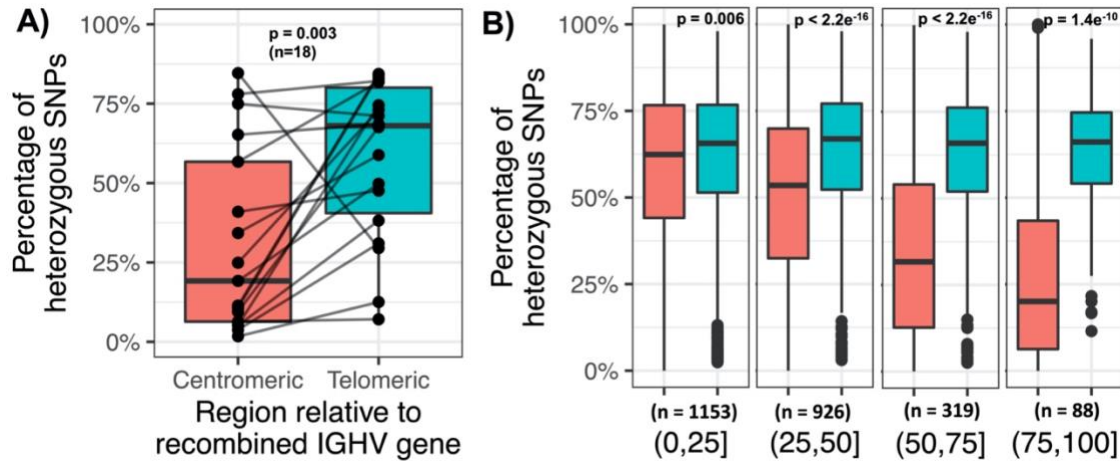

419

420 **Figure 4. Difference in heterozygosity in centromeric and telomeric regions of selected**  
421 **V(D)J recombination IGHV gene and clonality bias**

422 (A) Eighteen samples were predicted to be monoclonal. The percentage of heterozygous  
423 SNPs in the centromeric and telomeric regions of the IGHV gene selected for V(D)J  
424 recombination was calculated. Each line represents a single sample connecting the  
425 percentage of heterozygous SNPs in the centromeric and telomeric regions.

426 (B) Samples were split based on their clonality bias. Samples in the “(0,25]” group, the least  
427 clonal group, derived up to 25% of sequencing data from the dominant clone and  
428 samples in the “(75,100]” group, most clonal group, derived 75% to less than 100% of  
429 their sequencing data from a dominant clone. Similar to (A), the proportion of  
430 heterozygous SNPs was calculated in the centromeric and telomeric regions of the IGHV  
431 gene selected for V(D)J recombination.

432

433

434

435

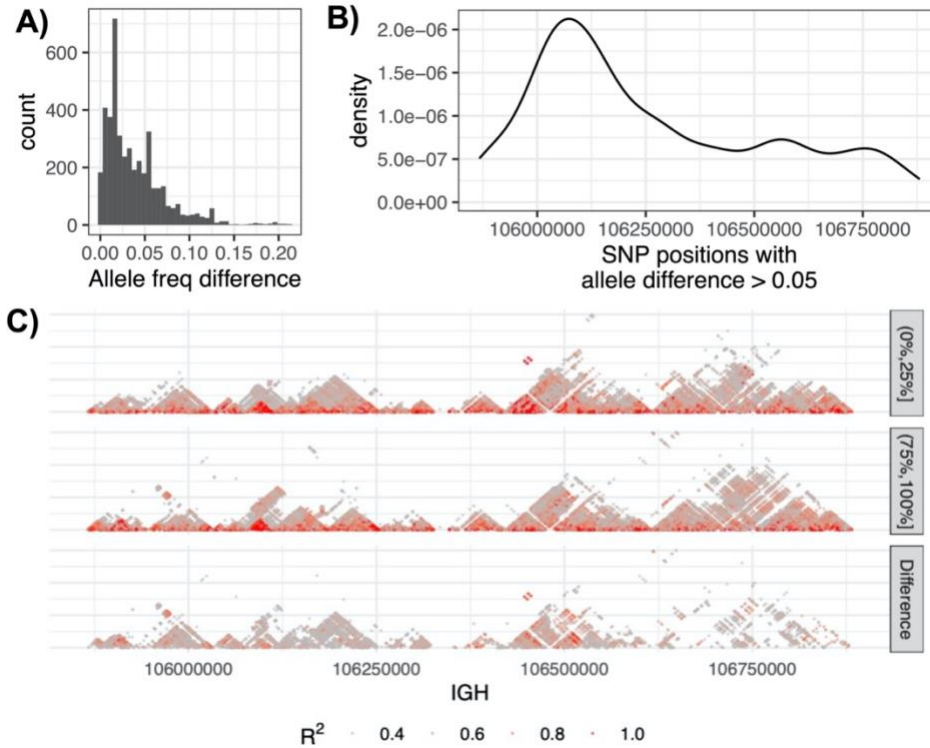

436

437 **Figure 5. Allele frequency and LD differences in individuals with low and high clonality**

438 (A) The distribution of common allele frequency difference between individuals with low  
439 clonality and high clonality, defined as 0 to 25% and 75% up to 100% of sequencing  
440 data was derived from a single clone, respectively.

441 (B) Position in IGH with common allele frequency differences greater than 0.05

442 (C) LD for African individuals with low (“(0%,25%]”) and high clonality (“(75%,100%]”), and  
443 the difference in LD between both groups.

444

445

446

447

448 **Supplementary Figures**

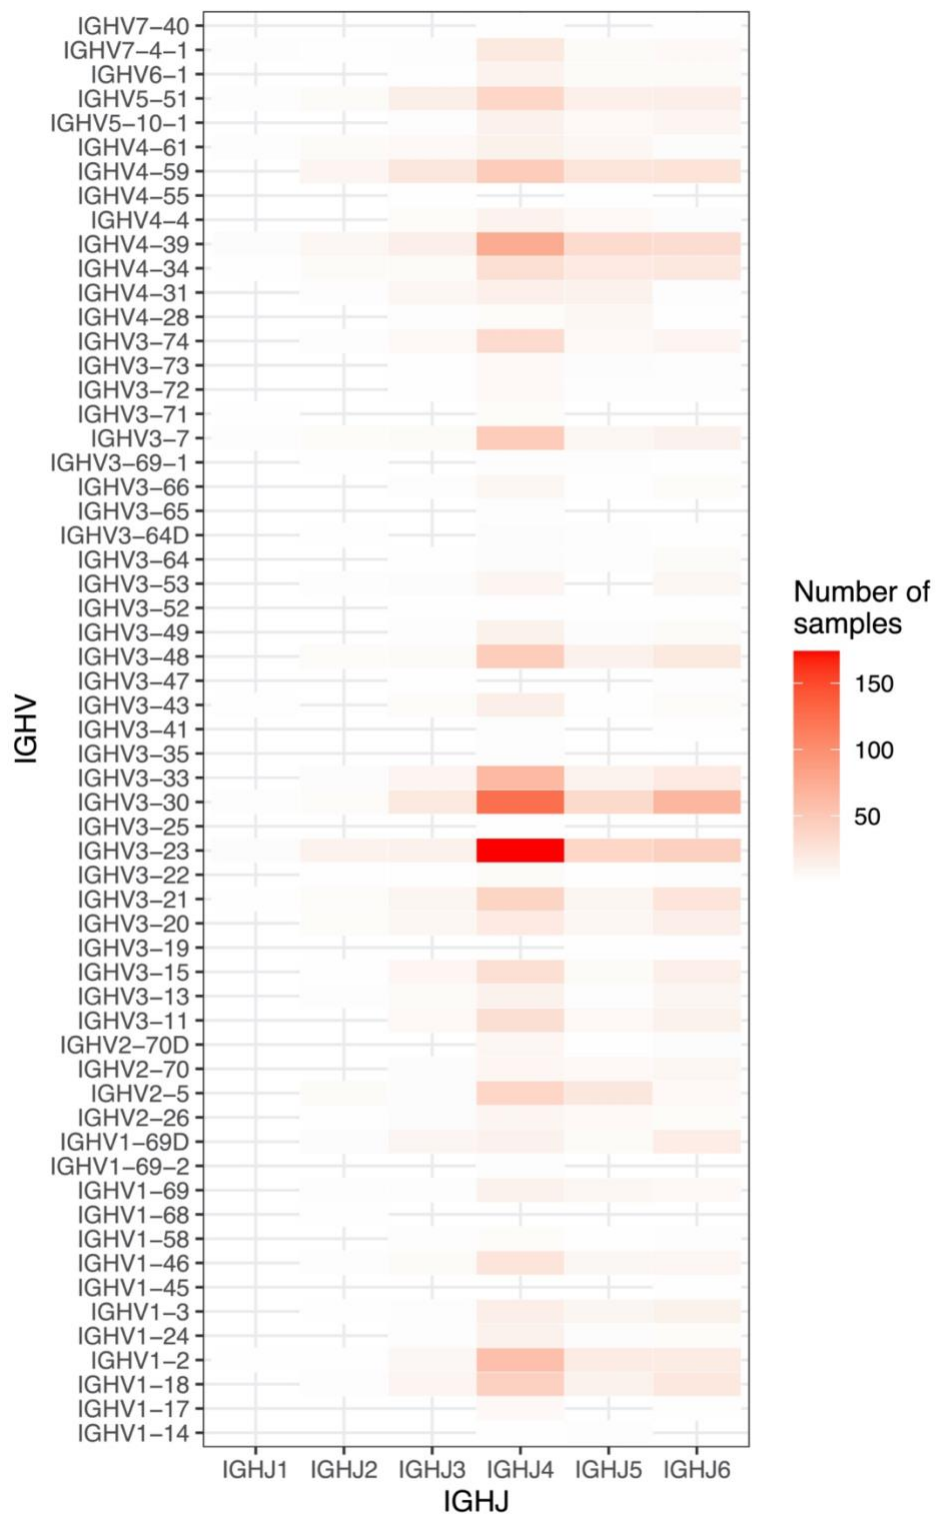

449

450 **Supp Fig 1. Number of samples with dominant clone containing IGHV and J pair**

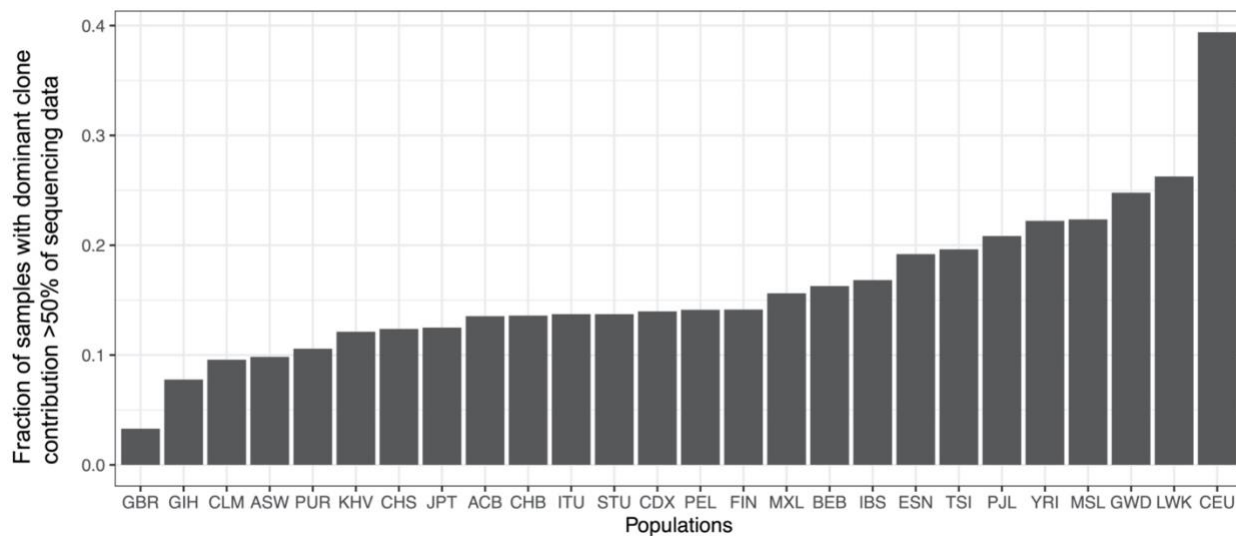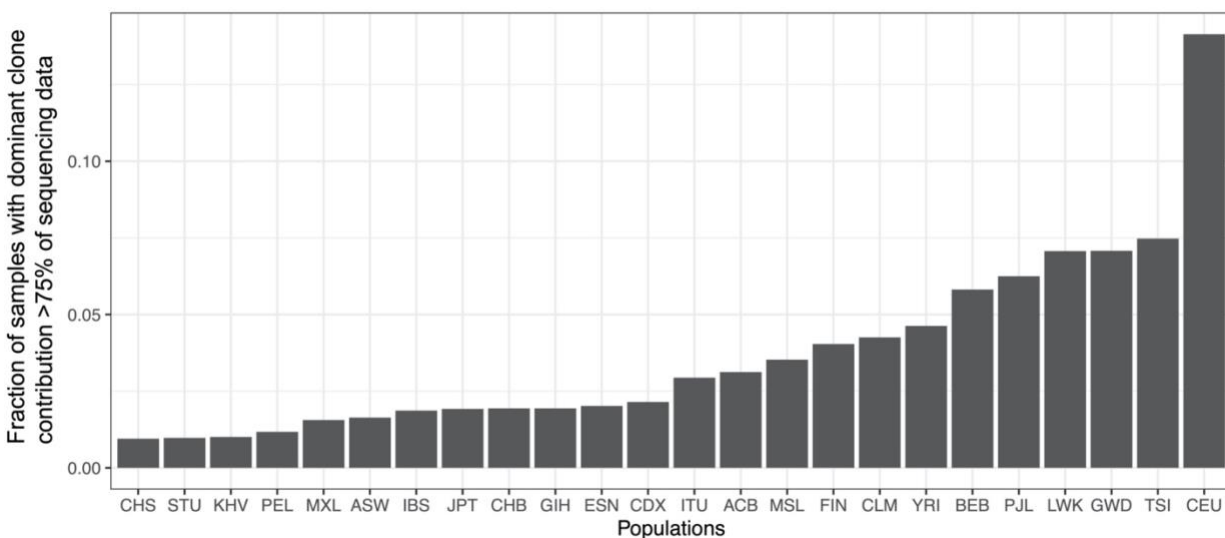

451

452 **Supp Fig 2. Fraction of samples per population where the dominant clone is more than**

453 **50% and 75% prevalent**

454

455

456

457

458

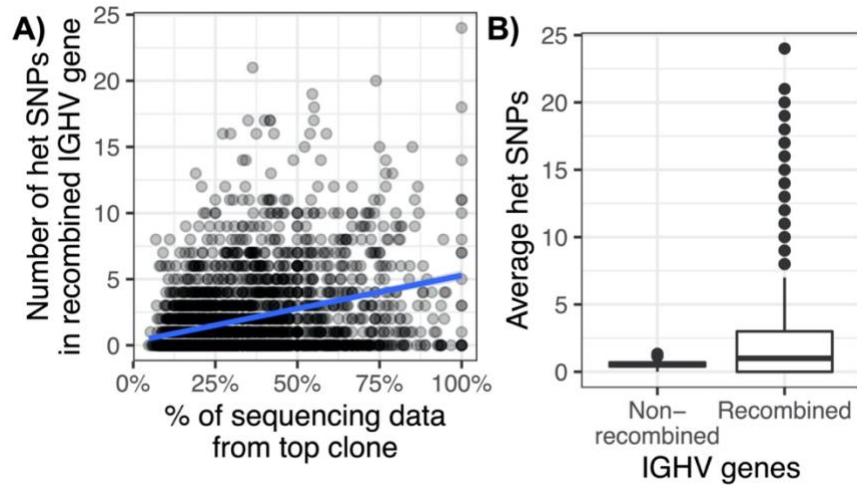

459

460 **Supp Fig 3. Effect of V(D)J recombination and clonality on heterozygous SNP calling**

461 (A) The number of heterozygous SNP in the V(D)J IGHV selected gene compared to the  
462 percentage of sequencing data from dominant clone

463 (B) The average number of heterozygous SNPs between IGHV genes selected for V(D)J  
464 recombination and not selected

465

466

467

468

469

470

471

472

473



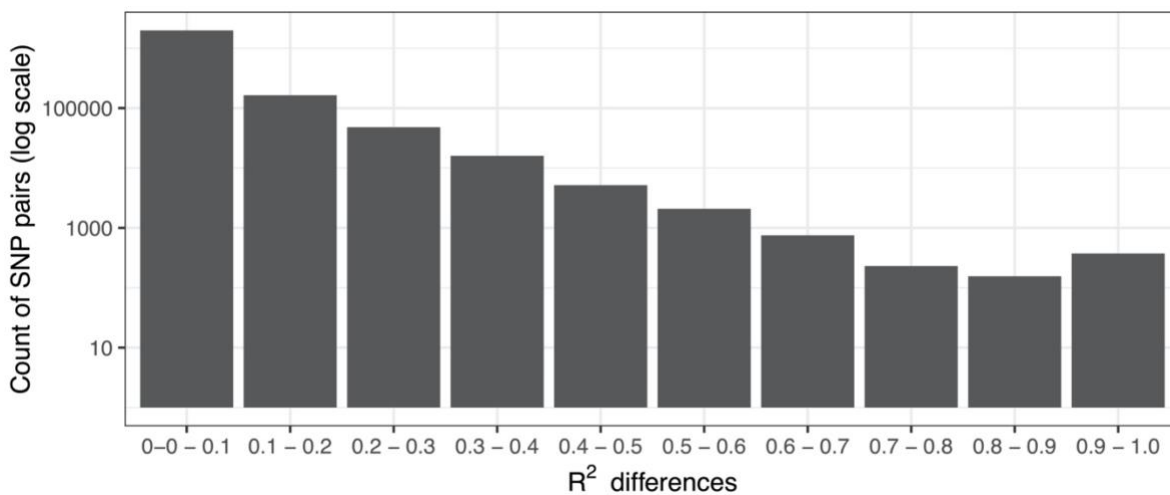

474

475 **Supp Fig 4. LD difference between African individuals with low clonality (0-25%) and high**

476 **clonality (75%-100%).**
